# Supplementary material for: RAAS-deficient organoids indicate delayed angiogenesis as a possible cause for autosomal recessive renal tubular dysgenesis
Source: PubMed Central journal article supplement (PMC10710424; doi:10.1038/s41467-023-43795-x), 2023-12-09
Supplement: 41467_2023_43795_MOESM1_ESM.pdf [file 41467_2023_43795_MOESM1_ESM.pdf]

**RAAS-deficient Organoids Indicate Delayed Angiogenesis as a possible cause for  
Autosomal Recessive Renal Tubular Dysgenesis**

Naomi Pode-Shaked<sup>1,2,3,4</sup>, Megan Slack<sup>1,2</sup>, Nambirajan Sundaram<sup>5</sup>, Ruth Schreiber<sup>6</sup>, Kyle  
McCracken<sup>1,2</sup>, Benjamin Dekel<sup>4,7</sup>, Michael Helmrath<sup>5</sup>, Raphael Kopan<sup>1,2,\*</sup>

<sup>1</sup>Department of Pediatrics, University of Cincinnati College of Medicine, Cincinnati, OH, 45229,  
USA

<sup>2</sup>Division of Developmental Biology, Cincinnati Children's Hospital Medical Center, Cincinnati,  
OH, 45229, USA

<sup>3</sup>Division of Nephrology and Hypertension, Cincinnati Children's Hospital Medical Center,  
Cincinnati, Ohio, USA.

<sup>4</sup>Sackler Faculty of Medicine, Tel Aviv University, Israel

<sup>5</sup>Division of Pediatric Surgery, Cincinnati Children's Hospital Medical Center, Cincinnati, OH,  
45229, USA

<sup>6</sup>Department of Pediatrics, Soroka University Medical Center, Ben Gurion University of the  
Negev, Beer Sheva, Israel.

<sup>7</sup>Pediatric Stem Cell Research Institute and division of pediatric nephrology, Edmond and Lily  
Safrá Children's Hospital, Sheba Medical Center, Ramat-Gan, Israel.

\*Author for correspondence: [Rafi.kopan@gmail.com](mailto:Rafi.kopan@gmail.com)

## Supplemental information – Table of content:

|                                                                      |             |
|----------------------------------------------------------------------|-------------|
| <b>SUPPLEMENTAL FIGURES AND LEGENDS</b> .....                        | <b>2</b>    |
| FIGURE S1   .....                                                    | 3           |
| FIGURE S2   .....                                                    | 4           |
| FIGURE S3   .....                                                    | 5           |
| FIGURE S4   .....                                                    | 7           |
| FIGURE S5   .....                                                    | 8           |
| FIGURE S6   .....                                                    | 9           |
| <b>SUPPLEMENTAL TABLES</b> .....                                     | <b>11</b>   |
| TABLE S1: ANTIBODIES USED IN THIS MANUSCRIPT.....                    | 11          |
| TABLE S2: PRIMERS AND GUIDE RNAs (GRNA) USED IN THIS MANUSCRIPT..... | 13          |
| TABLE S3: NUMBER OF MICE USED FOR ORGANOID TRANSPLANTATIONS.....     | 15          |
| <b>SUPPLEMENTAL NOTE</b> .....                                       | <b>..16</b> |
| AR-RTD patient’s phenotype description.....                          | 16          |

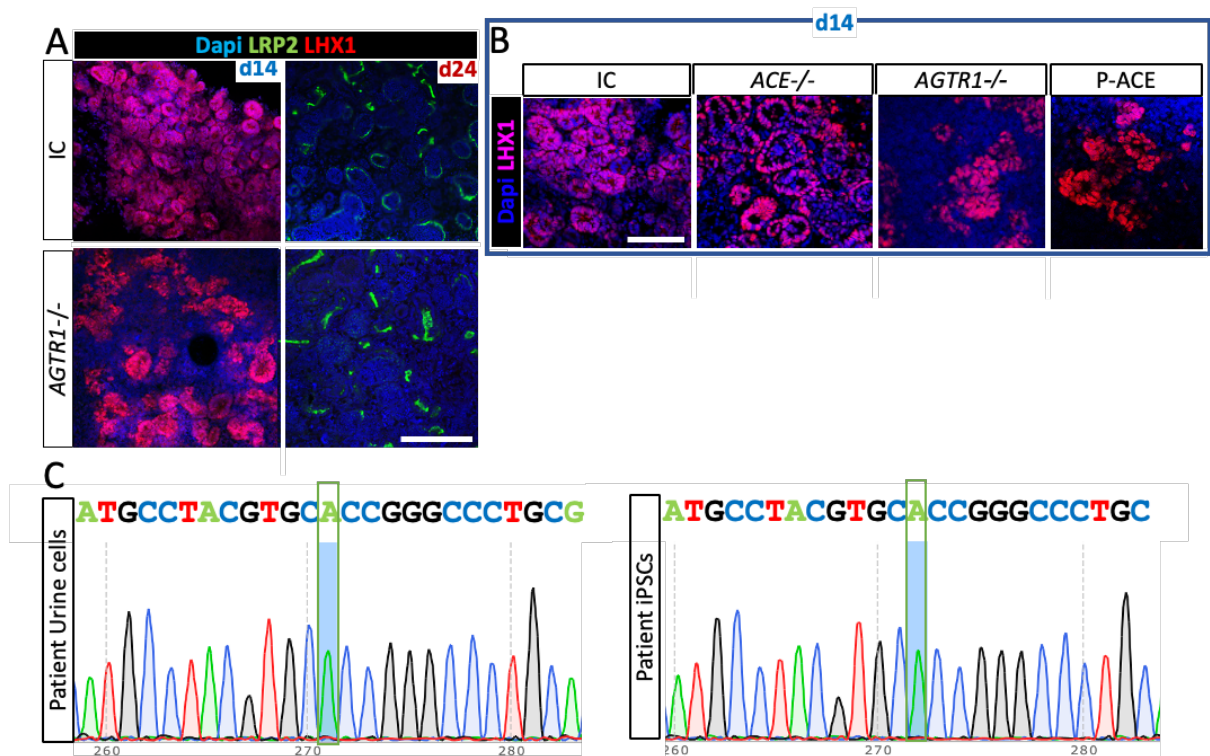

**Fig. S1, supporting Figures 1 and 2.** (A) Representative IF staining for the renal vesicle marker, LHX1 and the proximal tubule marker, LRP2 in isogenic control (IC) and *AGTR1*<sup>-/-</sup> d14 and d24 organoids. 100µm Scale bar for all the images in (A) is placed in the *AGTR1*<sup>-/-</sup>, d24 panel. (B) Representative IF staining of IC, *ACE*<sup>-/-</sup>, *AGTR1*<sup>-/-</sup> and P-ACE organoids at day 14 of the differentiation protocol for LHX1 (red). 100µm Scale bar for all the images in (B) is placed in the IC panel. (C) Sequencing DNA from donor urine cells and reprogrammed derivatives contain the biallelic c.2570G>A missense mutation in the *ACE* gene. Abbreviations: P-ACE- iPSC derived from urine cells of a patient with biallelic pathogenic variant in the *ACE* gene. C-ACE- iPSC in which the c.2570G>A *ACE* variant has been corrected with CRISPR/Cas9.

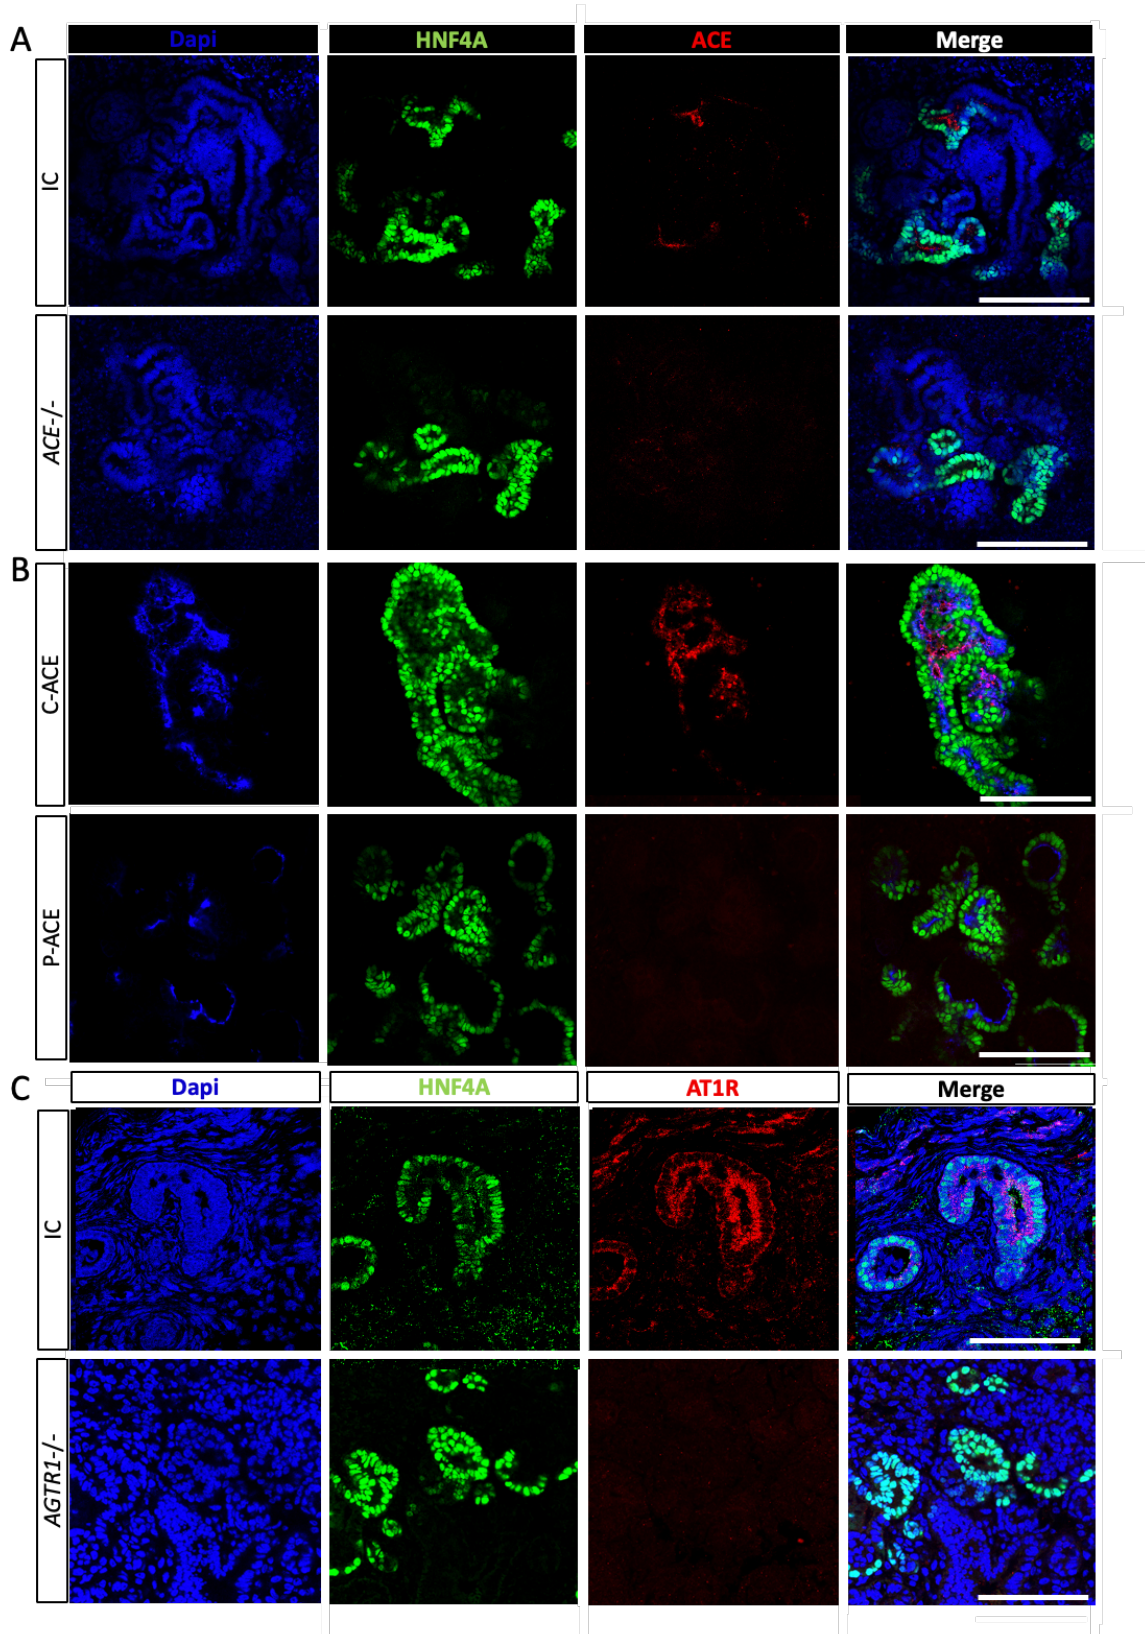

**Fig. S2, supporting Figure 2. Detection of ACE and AT1R in iPSC-derived organoids from mutant lines and Isogenic Controls (IC).** (A-B) Immunofluorescence staining for ACE in ACE<sup>-/-</sup> and P-ACE iPSC-derived organoids compared with their corresponding ICs (IC, C-ACE) for ACE. (C) Staining for AT1R in AGTR1<sup>-/-</sup> and IC iPSC-derived organoids. IC=Isogenic control. P-ACE=AR-RTD patient-derived iPSC. C-ACE=CRISPR-corrected iPSCs. Scale bars=100µm are shown in the merged images (right).

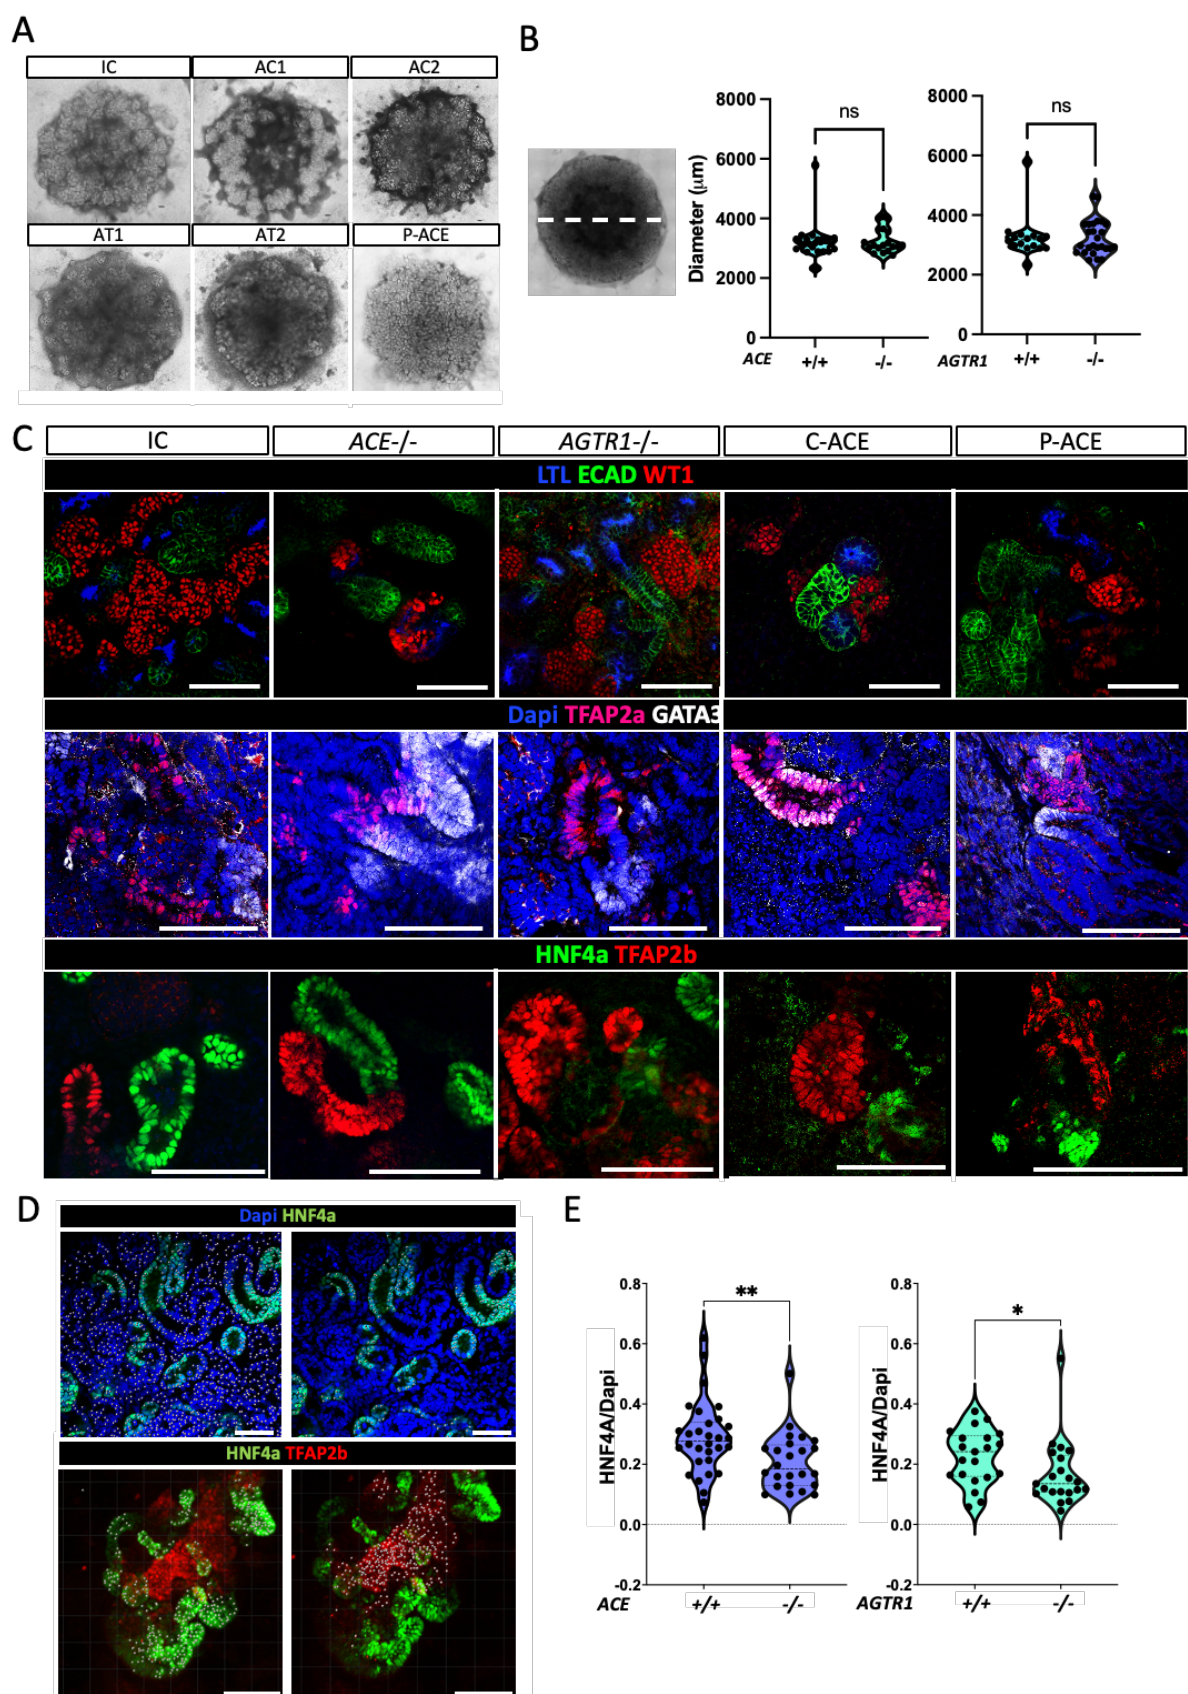

**Fig. S3, supporting Figure 3. Characterization of *ACE*<sup>-/-</sup>, *AGTR1*<sup>-/-</sup> and P-ACE iPSC derived organoids. (A) Representative bright field images of Isogenic Control (IC), *ACE*<sup>-/-</sup>, *AGTR1*<sup>-/-</sup>, and P-ACE iPSC-derived organoids. (B) Diameter distribution calculated for *ACE*<sup>-/-</sup> and *AGTR1*<sup>-/-</sup> organoids relative to their respective ICs. Calculations were performed on**

n=19 *ACE*<sup>-/-</sup>, n=26 IC (*ACE*<sup>+/+</sup>), n=26 *AGTR1*<sup>-/-</sup> and n=16 IC (*AGTR1*<sup>+/+</sup>) organoids from n=4 biologically independent differentiation experiments. Graphs present the mean  $\pm$ S.E.M of organoid diameters; Comparisons were performed using a two-sided t-test. ns=not significant ( $p$ -value>0.05). (C) Immunofluorescence staining of *ACE*<sup>-/-</sup>, *AGTR1*<sup>-/-</sup> and patient (P-*ACE*) iPSC-derived organoids compared with their corresponding ICs (IC, C-*ACE*) for PT (LTL, HNF4a), LOH/DT/CT (TFAP2a/b, ECAD, GATA3) and podocytes (WT1). (D) Representative section from a z-stack of HNF4a, TFAP2b, and Dapi stain IC organoids analyzed with IMARIS. Shown are individual cells identified by the software for HNF4a+ and Dapi+ quantification (top) or HNF4a+ and TFAP2b+ (bottom). (E) Graphs display the mean ratio of HNF4a (PT cells) to Dapi positive cells (all cells) in *ACE*<sup>-/-</sup> or *AGTR1*<sup>-/-</sup> organoids and their respective ICs. Each dot represents the mean HNF4a+/Dapi+ ratio of x4 z-sections per organoid. Quantification was performed on n=21 organoids for *ACE*<sup>-/-</sup> or IC and on n=24 organoids for *AGTR1*<sup>-/-</sup> or n=30 for respective IC from n=4 biologically independent differentiation experiments. Data is presented as mean  $\pm$ S.E.M of the HNF4a+/Dapi+ ratio; Comparisons were performed using a two-sided t-test. \* $p$ =0.013, \*\* $p$ =0.004. Scale bars=100 $\mu$ m are indicated in each image. IC=Isogenic Control. PT- Proximal Tubules, DT- Distal Tubules, LOH- Loop of Henle, LTL- Lotus tetragonolobus lectin, HNF4a - Hepatocyte Nuclear Factor 4 $\alpha$ , TFAP2b - Transcription factor AP-2 beta. Source data for Figures S3B and E are provided as a Source Data file.

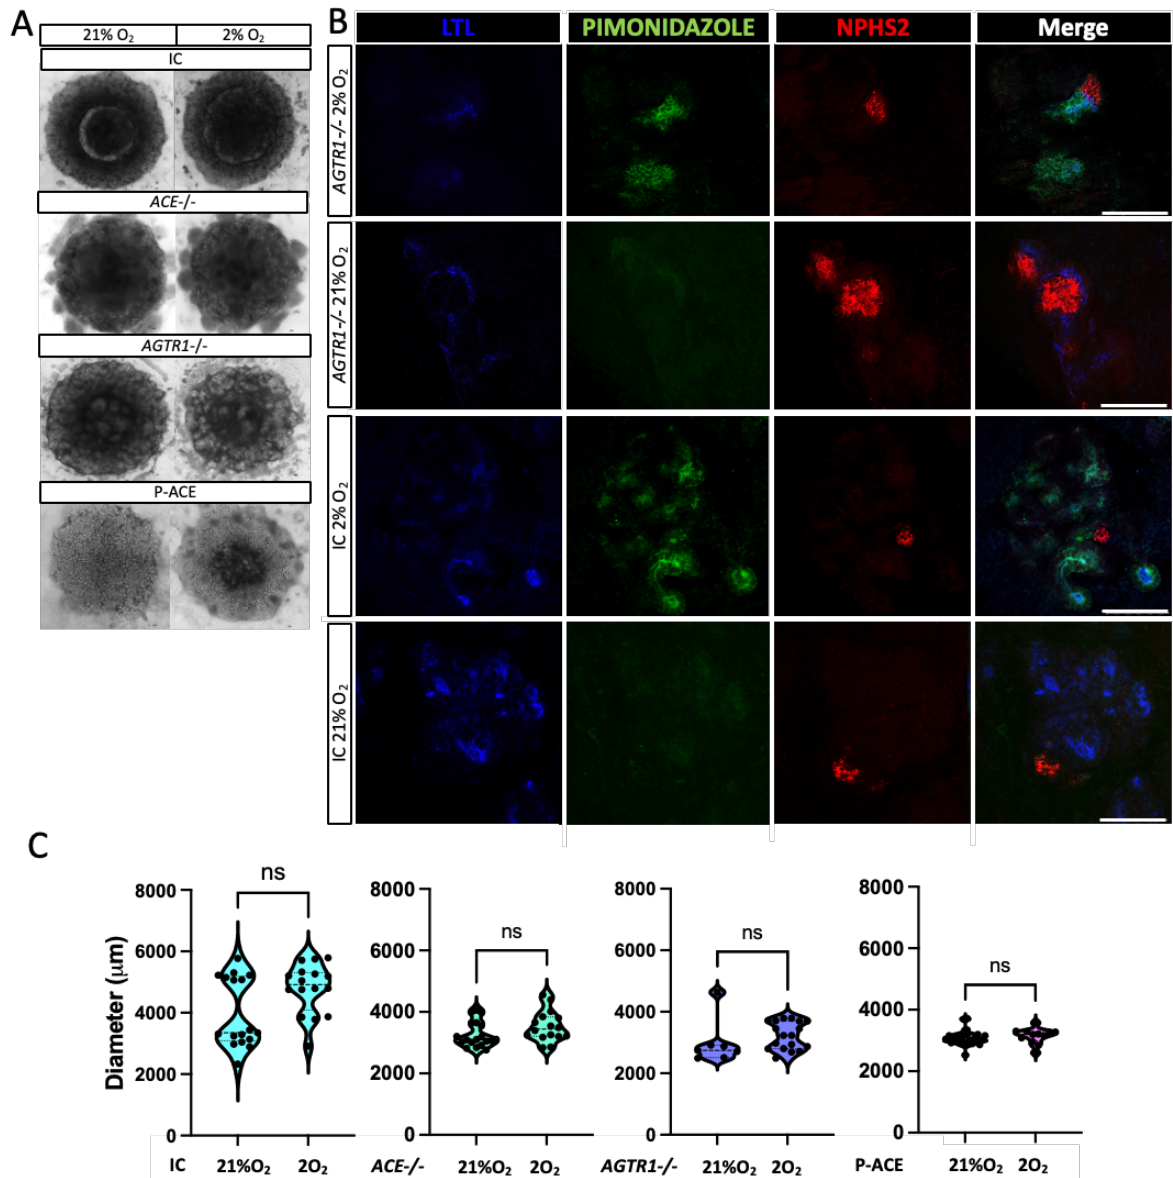

**Fig. S4, supporting Figure 4. Characterization of *ACE*<sup>-/-</sup>, *AGTR1*<sup>-/-</sup>, and P-ACE iPSC derived organoids grown in standard versus hypoxic conditions.** (A) Representative bright field images of IC, *ACE*<sup>-/-</sup>, *AGTR1*<sup>-/-</sup>, and P-ACE iPSC-derived organoids grown in 21% O<sub>2</sub> or hypoxic (2% O<sub>2</sub>) conditions. (B) Immunofluorescent staining for pimonidazole (hypoxia marker, green), LTL (blue) and NPHS2 (red), in *AGTR1*<sup>-/-</sup> and IC organoids grown in standard (21% O<sub>2</sub>) or hypoxic (2% O<sub>2</sub>) conditions. Scale bars=100µm are indicated in each image. (C) Diameter of IC, *ACE*<sup>-/-</sup>, *AGTR1*<sup>-/-</sup>, and P-ACE iPSC-derived organoids grown in 21% O<sub>2</sub> compared to 2% O<sub>2</sub>. Calculations were performed on IC organoids grown in 21% O<sub>2</sub> (n=20) or 2% O<sub>2</sub> (n=19), *ACE*<sup>-/-</sup> organoids grown in 21% O<sub>2</sub> (n=19) or 2% O<sub>2</sub> (n=16), *AGTR1*<sup>-/-</sup> organoids grown in 21% O<sub>2</sub> (n=7) or 2% O<sub>2</sub> (n=18) and P-ACE organoids grown in 21% O<sub>2</sub> (n=26) or 2% O<sub>2</sub> (n=12) from n=4 biologically independent differentiation experiments. Graphs present the mean ±S.E.M of organoid diameters. Comparisons were performed using a two-sided t-test. ns=not significant (*p*-value>0.05). Scale bars=100µm are indicated in each merged image. P-ACE=AR-RTD patient-derived iPSC. Source data for Figure S4C are provided as a Source Data file.

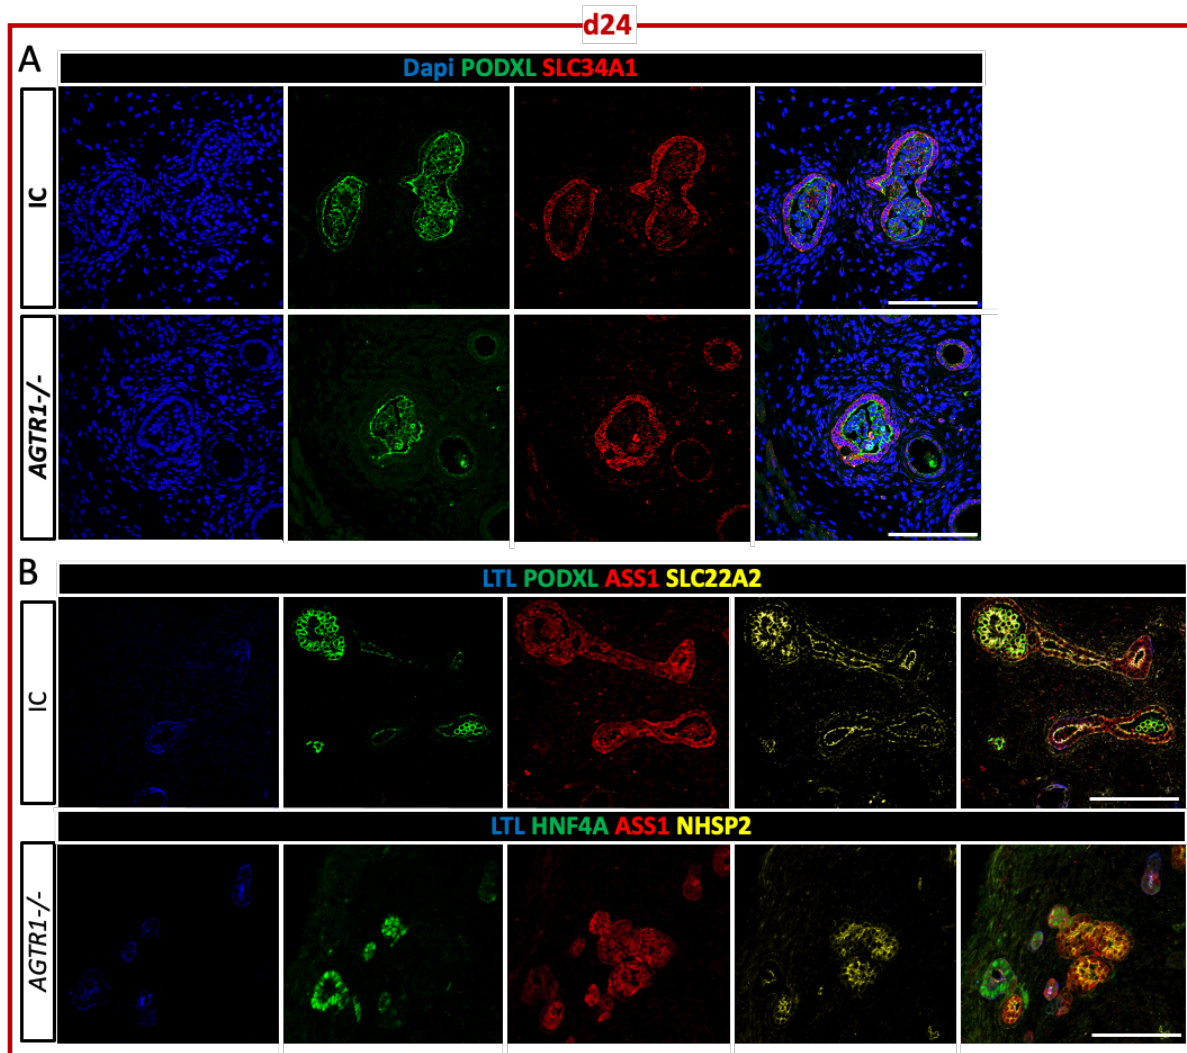

**Fig. S5, supporting Figure 5. Characterization of *AGTR1*<sup>-/-</sup> and IC iPSC-derived organoids transplanted at d24 under the kidney capsule of immunodeficient mice. (A) IF staining of *AGTR1*<sup>-/-</sup> and IC extracted organoids for Dapi, PODXL (podocyte) and SLC34A1 (PT). (B) IF staining of *AGTR1*<sup>-/-</sup> and IC extracted organoids for LTL, PODXL, ASS1, SLC22A2, HNF4a and NPHS2. Scale bars=100µm are indicated in the images.**



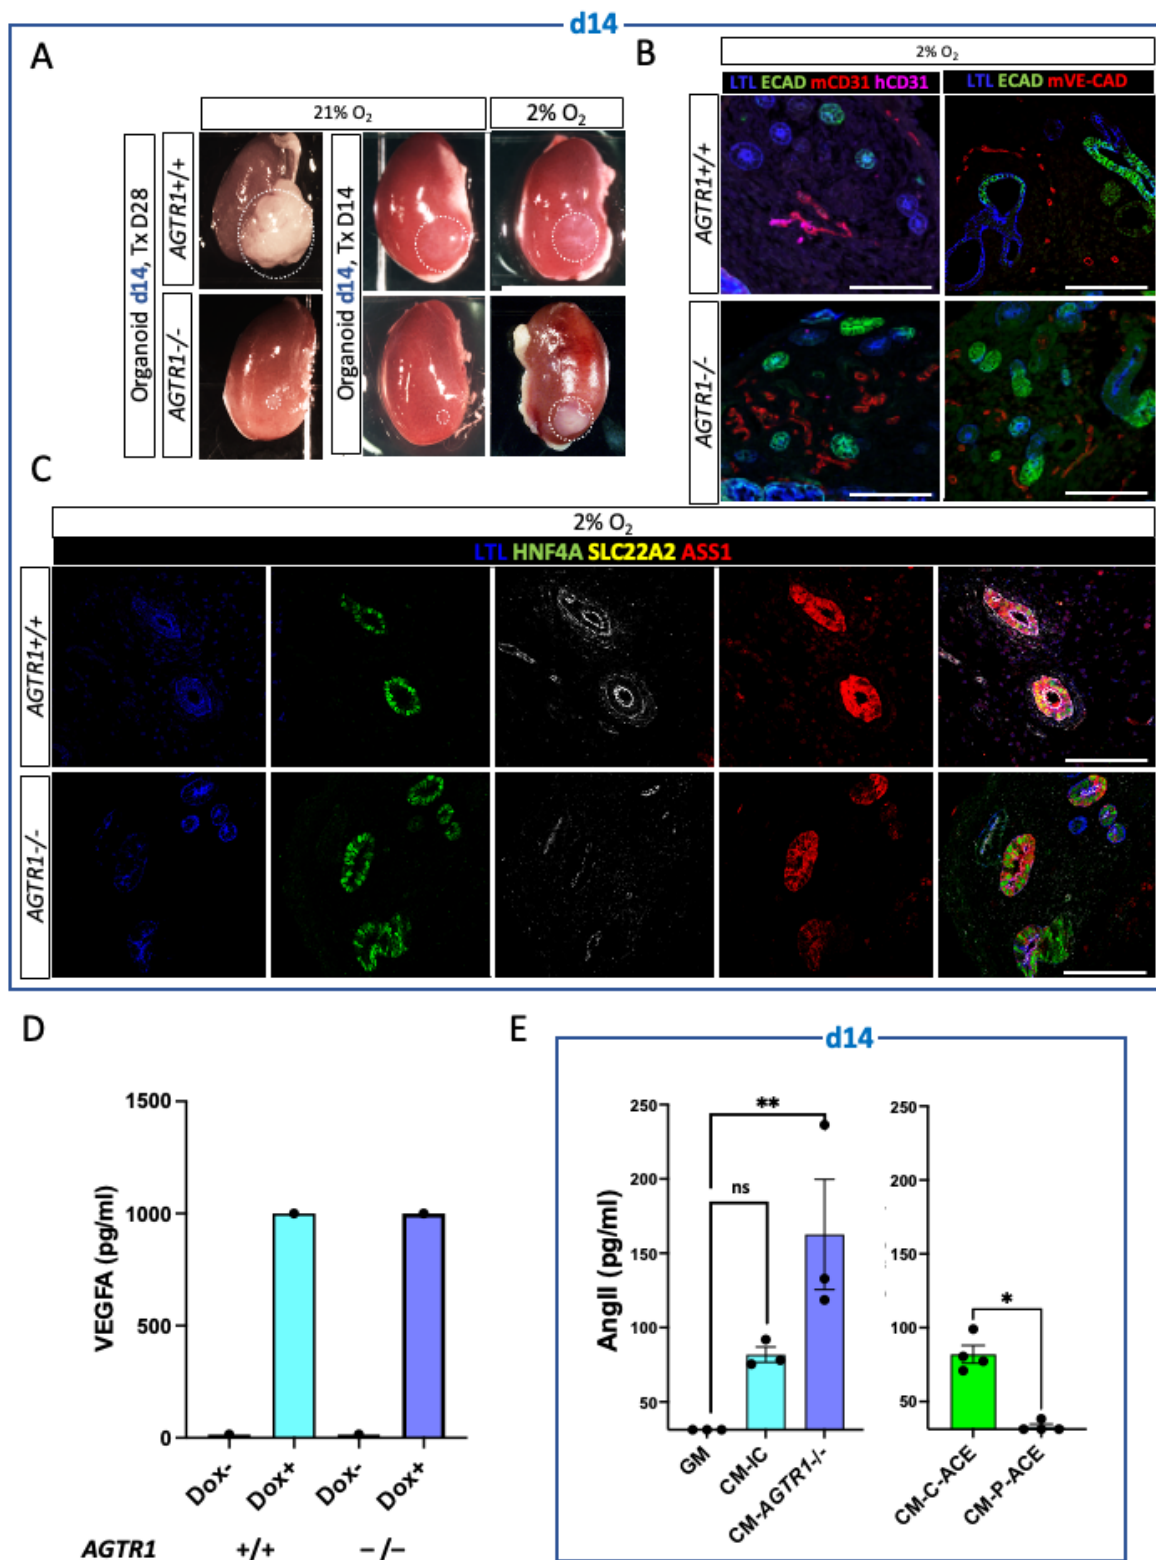

**Fig. S6, supporting Figures 6 and 7.** (A) Images of Isogenic Control (IC) and *AGTR1*<sup>-/-</sup> iPSC derived organoids grown at 21%O<sub>2</sub> or 2%O<sub>2</sub>, transplanted at d14, and extracted at d28 (TxD28) or d14 (TxD14). (B) IF staining of explanted *AGTR1*<sup>-/-</sup> and IC-derived organoids (grown in 2%O<sub>2</sub> prior to transplantation at day 14) for mouse CD31 (mCD31), human CD31 (hCD31) or mVE-Cadherin (mVE-CAD). (C) IF staining for Proximal Tubule (PT) maturation

markers (LTL, HNF4a, SLC22A2 and ASS1) in explanted *AGTR1*<sup>-/-</sup> and IC-derived organoids, grown in 2%O<sub>2</sub> prior to transplantation at d14. Scale bars=100µm are indicated in the merged images. (D) ELISA assay for detection of human VEGF-A protein in conditioned media (CM) from *AGTR1*<sup>-/-</sup> and IC (+/+) iPSCs infected with lentivirus harboring a doxycycline (Dox)-inducible hVEGF-A construct and selected with Blasticidin. Cells were either treated with Dox for 48h (Dox+) or left untreated (Dox-). Results are presented as the mean ±S.E.M of n=3 biologically independent experiments. In all experiments, VEGF-A was undetectable without Dox induction (<15.6pg/ml) and expressed over the upper limit detected by the assay (1000pg/ml) following Dox induction. (E) Quantification of Angiotensin II (AngII) protein secretion in growth media (GM) or in CM from day 14 IC (CM-IC), *AGTR1*<sup>-/-</sup> (CM-*AGTR1*<sup>-/-</sup>), C-ACE (CM-C-ACE) or P-ACE (CM-P-ACE) organoids. Results are presented as the mean±S.E.M of n=3 biologically independent experiments for GM, CM-IC, and CM-*AGTR1*<sup>-/-</sup> and n=4 biologically independent experiments for C-ACE and P-ACE. Comparisons between GM, CM-IC, and CM-*AGTR1*<sup>-/-</sup> were performed using one-way ANOVA on ranks. P-values were adjusted for multiple comparisons using the two-stage step-up method of Benjamini, Krieger and Yekutieli. ns=non-significant ( $p=0.09$ ). \*\* $p=0.007$ . Comparison between C-ACE and P-ACE was performed using a two-sided t-test. \* $p=0.03$ . The lower limit of detection of AngII by the ELISA kit was 31.25pg/ml. P-ACE=AR-RTD patient-derived iPSC. C-ACE=CRISPR-corrected iPSCs. Source data for Figure S6D and E are provided as a Source Data file.

**Supplementary Table 1: Antibodies used in this manuscript.**

| <u>Antibody</u>             | <u>Source</u>                    | <u>Catalog/clone<br/>Number</u> | <u>Dilution<br/>factor</u> |
|-----------------------------|----------------------------------|---------------------------------|----------------------------|
| <b>Immunofluorescence</b>   |                                  |                                 |                            |
| Anti Human ACE              | Sigma-Aldrich                    | HPA029298                       | 1:200                      |
| Anti Human AGTR1            | Bioss Antibodies                 | BS-2097R                        | 1:200                      |
| Anti Human ASS1             | Abcam                            | ab77590                         | 1:100                      |
| Anti Human CD31             | Novus Biologicals                | NBP2-80640                      | 1:200                      |
| Anti Human CUBN             | Sigma-Aldrich                    | SAB4301904                      | 1:100                      |
| Anti Human E-Cadherin       | BD Transduction<br>Laboratories™ | 610182                          | 1:350                      |
| Anti Human GATA3            | BioTechne R&D                    | AF2605                          | 1:500                      |
| Anti Human HNF4a            | Abcam                            | ab41898                         | 1:200                      |
| Anti Human Kim1             | R&D Systems                      | AF1750                          | 1:200                      |
| Anti Human KRT8/18          | Abcam                            | ab194130                        | 1:1000                     |
| Anti Human LIM1/LHX1        | Abcam                            | ab229474                        | 1:250                      |
| Anti Human LRP2/Megalin     | BioTechne R&D                    | MAB9578-100                     | 1:100                      |
| LTL (Biotinylated)          | Vector<br>Laboratories           | B-1325-2                        | 1:500                      |
| Anti Human Nephrin/NPHS1    | R&D Systems                      | AF4269                          | 1:300                      |
| Anti Human Podocalyxin      | BioTechne R&D                    | MAB1658                         | 1:50                       |
| Anti Human Podocin/NPHS2    | Proteintech                      | 20384-1-AP                      | 1:100                      |
| Anti Human SLC22A2          | Abcam                            | ab170871                        | 1:100                      |
| Anti Human SLC34A1          | ThermoFisher                     | PA5-62358                       | 1:100                      |
| Anti Human TFAP2B           | Cell Signaling<br>Technology     | 2509S                           | 1:200                      |
| Anti Human TROMA-1          | Sigma-Aldrich                    | MABT329                         | 1:50                       |
| Anti Human VE-Cadherin      | Novus Biologicals                | NBP1-43347                      | 1:200                      |
| Anti Human VEGF-A           | Abcam                            | ab52917                         | 1:250                      |
| Anti Human WT1              | Santa Cruz                       | sc-393498                       | 1:20                       |
| Anti mosue VE Cadherin      | Novus Biologicals                | AF1002-SP                       | 1:200                      |
| Anti mosue CD31             | Cell Signaling<br>Technology     | 77699T                          | 1:200                      |
| <b>Seconadry antibodies</b> |                                  |                                 |                            |

|                                                                 |                   |             |       |
|-----------------------------------------------------------------|-------------------|-------------|-------|
| Donkey Anti-Rabbit IgG H&L (Alexa Fluor 488)                    | Abcam             | ab150073    | 1:400 |
| Donkey Anti-Mouse IgG H&L (Alexa Fluor 488)                     | Abcam             | ab150105    | 1:400 |
| Donkey Anti-Goat IgG H&L (Alexa Fluor 647)                      | Abcam             | ab150131    | 1:400 |
| Donkey Anti-Rat IgG H&L (Alexa Fluor 647)                       | Abcam             | ab150155    | 1:400 |
| Donkey Anti-Rabbit IgG H&L (Alexa Fluor 568)                    | Abcam             | ab175470    | 1:400 |
| Donkey F(ab') <sub>2</sub> Anti-Mouse IgG H&L (Alexa Fluor 568) | Abcam             | ab175699    | 1:400 |
| Streptavidin, Alexa Fluor™ 405 conjugate                        | Invitrogen        | S32351      | 1:400 |
| <b>Flow Cytometry</b>                                           |                   |             |       |
| Anti human ACE conjugated to APC                                | Miltenyi Biotech  | 130-108-014 | 1:11  |
| human IgG1 Isotype control                                      | Miltenyi Biotech  | 130-113-446 | 1:50  |
| Anti human ATIR conjugated to APC                               | Novus Biologicals | FAB10244A   | 1:11  |
| IgG2b kappa Isotype Control                                     | eBioscience™      | 17-4031-82  | 1:100 |
| 7-AAD                                                           | eBioscience™      | 00-6993-50  | 1:11  |

**Supplemental Table 2: Primers and guide RNAs (gRNA) used in this manuscript.**

| Gene                                                          | Forward                                                                                                                                                                                                                                                                                           | Reverse                     |
|---------------------------------------------------------------|---------------------------------------------------------------------------------------------------------------------------------------------------------------------------------------------------------------------------------------------------------------------------------------------------|-----------------------------|
| <i>VEGF-A</i>                                                 | AGGGCAGAATCATCACGAAG                                                                                                                                                                                                                                                                              | AGGGTCTCGATTGGATGGCA        |
| <i>VEGF-A165</i>                                              | GAGCAAGACAAGAAAATCCC                                                                                                                                                                                                                                                                              | CCTCGGCTTGTACATCTG          |
| <i>VEGF-A121</i>                                              | AGGCCAGCACATAGGAGAGA                                                                                                                                                                                                                                                                              | GCCTCGGCTTGTACATTTTT        |
| <i>VEGF-A189</i>                                              | TAAGTCCTGGAGCGTTCCT                                                                                                                                                                                                                                                                               | ACGCGAGTCTGTGTTTTTGC        |
| ACE flanking the deletion (Exon 10 to intron 15)              | GCCTGAAACTCCCTCTTCCAG                                                                                                                                                                                                                                                                             | CCATTTGGAGTCCAAGCCCATG      |
| ACE within the deletion (intron 13)                           | CTTGAAGCCAGGAGTTGGAG                                                                                                                                                                                                                                                                              | CCTTAGGAAGGAGCCAGCTT        |
| <i>AGTR1</i> flanking the deletion                            | AGGCTTTATCAGTTCACAGTGT                                                                                                                                                                                                                                                                            | TGTGGCTTTGCTTTGTCTTGT       |
| <i>AGTR1</i> within the deletion                              | ACTCACGTGTCTCAGCATTG                                                                                                                                                                                                                                                                              | TCACGTATGATGCCTAGTTGAA      |
| <i>GAPDH</i>                                                  | CAATGACCCCTTCATTGACC                                                                                                                                                                                                                                                                              | GACAAGCTTCCCGTTCTCAG        |
| <i>hSLC22A2</i>                                               | AGGGTCTCGATTGGATGGCA                                                                                                                                                                                                                                                                              | GTTAAACTCGGTGACGATGGAC      |
| <i>hSLC34A1</i>                                               | CCCTCAGGTCTACACAGGAT                                                                                                                                                                                                                                                                              | GGAGCAGACGAAGAGGTAGAG       |
| <i>hSLC22A5</i>                                               | TCCACCATTGTGACCGAGTG                                                                                                                                                                                                                                                                              | ACCCACGAAGAACAAGGAGATT      |
| <i>hSLC5A12</i>                                               | AGGCAACTTCCCGAGAGTTC                                                                                                                                                                                                                                                                              | CCCCAAAGCGGTAGACTTCAG       |
| <i>hSLC7A13</i>                                               | TTGGCTCCACGGTTGCTTTT                                                                                                                                                                                                                                                                              | CCAATGCCAGACATTTCTTAGG<br>C |
| ACE Exon 17 for c.2570 A>G sequencing                         | GCAGGTAATGTGGTGTGGG                                                                                                                                                                                                                                                                               | GGTGACTTGCCCGACATAGA        |
| gRNA sg320                                                    | GTTTCGTTTTCGGGTAACAGG AGG                                                                                                                                                                                                                                                                         |                             |
| gRNA sg321                                                    | GCATGGTATGAAGTAGGTGC CGG                                                                                                                                                                                                                                                                          |                             |
| gRNA Sg431                                                    | GAGAATCATTTTGTACCTGGG                                                                                                                                                                                                                                                                             |                             |
| gRNA Sg433                                                    | TTGGTAGTGAAGTGCTGCAGAGG                                                                                                                                                                                                                                                                           |                             |
| gRNA containing the ACE c.2570 A>G mutation                   | CCTGCATGCCTACGTGCaCC                                                                                                                                                                                                                                                                              |                             |
| Donor sequence used for correction of ACE c.2570 A>G mutation | C*C*C*GACATGTGCCCTTACCCAC<br>AGGTGAGCAGGAATGGGCCCTC<br>CAGGTTGATGTGCTGGGCCCGT<br>AGTGACGGTGCAGGGCgCG<br>GCGCACGTAGGCATGCAGGTTGA<br>GGTAGAGTGGCGACATGTGCCCT<br>TACCCAGCAGGTGAGCAGGAATG<br>GGCCCCCTCCAGGTTGATGTGCTG<br>GGCCCCGTAGTGACGGTGCAGG<br>GCGCGGcGCACGTAGGCATGCAG<br>GTTGAGGTAGAGTGGC*T*G*C. |                             |

|                                      |                                                           |                                                      |
|--------------------------------------|-----------------------------------------------------------|------------------------------------------------------|
| hACE_R857H<br>_gen                   | 5'-AGGTAATGTGGTGTGGGAG-3'                                 | 5'-ACCCTCTAGTCAGCCCTGTC-<br>3'                       |
| Primers for<br>cloning of<br>hVEGF-A | ggggACAAGTTTGTACAAAAAAGCA<br>GGCTatgaacttctgctgtcttgggtgc | ggggACCACTTTGTACAAGAAAG<br>CTGGGTtcaccgcctcggcttgcac |

**Supplemental Table 3: Number of mice used for organoid transplantations.**

| <b>No. of recipient mice for organoid transplantation, per growth condition<br/>(engrafted organoids/total no. implanted)</b> |                                             |                                             |                |
|-------------------------------------------------------------------------------------------------------------------------------|---------------------------------------------|---------------------------------------------|----------------|
| <b>Oxygen:</b>                                                                                                                | <b>21% O2</b>                               |                                             | <b>2% O2</b>   |
| <b>iPSC line</b>                                                                                                              | <b>Transplantation<br/>of d24 organoids</b> | <b>Transplantation of<br/>d14 organoids</b> |                |
| <b>Isogenic Control<br/>(IC)</b>                                                                                              | <b>4 (4/4)</b>                              | <b>22 (22/22)</b>                           | <b>4 (4/4)</b> |
| <b>AGTR1-/-</b>                                                                                                               | <b>4 (4/4)</b>                              | <b>22 (0/22)</b>                            | <b>6 (6/6)</b> |
| <b>AGTR1-/- + Dox-<br/>inducible VEGF-A</b>                                                                                   | <b>–</b>                                    | <b>4 (4/4)</b>                              | <b>–</b>       |

**Supplemental Note:**

**AR-RTD patient's phenotype.** The patient is a female, born at 30 weeks of gestation following a pregnancy complicated with oligohydramnios (AFI 2, N 8-18) and IUGR since 22<sup>nd</sup> weeks of gestation. Following birth, she was anuric and developed hyperkalemia for which peritoneal dialysis was initiated. She required Dopamine for profound hypotension and Fluconazole. ACE serum levels were undetectable, Renin serum levels were elevated >5000uIU/ml, Aldosterone was at the normal range. Following treatment with Fludrocortisone and blood pressure stabilization kidney function was partially recovered. She was discharged from the NICU at age 3 months and continues close follow-up by the pediatric nephrology unit at the Soroka Medical Center. She is currently 12 years old with CKD stage 3. ACE level remains undetectable and Renin remains >5000uIU/ml. Kidney ultrasound remains unremarkable apart for simple cysts (x1 in each kidney). IUGR- Intra-uterine growth restriction.
